# Supplementary material
Source: publisher figshare collection journal article supplement (https://asha.figshare.com/articles/dataset/_/7761872)
Supplement: Supplementary file 1 [file 1]

**Supplemental Material S2.** Evolution of the secondary outcome parameters pre- to post-therapy in the IVT-I, IVT-G, and TVT groups.

|                                          |       | Baseline 1           | Baseline 2           | Post                 | Time *<br>Group | Evolution mean<br>baseline – post |
|------------------------------------------|-------|----------------------|----------------------|----------------------|-----------------|-----------------------------------|
| Parameter                                | Group | EM (95% CI)          | EM (95% CI)          | EM (95% CI)          | <i>p</i> value  | EM difference                     |
| Maximum performance task                 |       |                      |                      |                      |                 |                                   |
| MPT (s)                                  | IVT-I | 15.9 (12.4; 19.5)    | 16.1 (12.5; 19.7)    | 18.3 (14.8; 21.9)    | .592            | +2.3                              |
|                                          | IVT-G | 17.6 (14.1; 21.1)    | 17.7 (14.2; 21.2)    | 18.7 (15.2; 22.1)    |                 | +1.1                              |
|                                          | TVT   | 15.1 (11.7; 18.5)    | 15.6 (12.1; 19.0)    | 19.1 (15.5; 22.7)    |                 | +3.8                              |
| Aerodynamic assessment                   |       |                      |                      |                      |                 |                                   |
| VC (cc)                                  | IVT-I | 2449 (2161; 2736)    | 2551 (2296; 2807)    | 2517 (2276; 2757)    | .893            | +17                               |
|                                          | IVT-G | 2544 (2298; 2791)    | 2519 (2282; 2756)    | 2512 (2271; 2753)    |                 | –20                               |
|                                          | TVT   | 2403 (2170; 2636)    | 2371 (2139; 2605)    | 2313 (2062; 2563)    |                 | –74                               |
| PQ (cc/s)                                | IVT-I | 179.2 (146.4; 211.9) | 167.0 (137.9; 196.0) | 156.6 (129.3; 183.8) | .438            | –16.5                             |
|                                          | IVT-G | 154.4 (126.5; 182.4) | 152.0 (125.1; 178.9) | 144.4 (117.0; 171.8) |                 | –8.8                              |
|                                          | TVT   | 184.6 (158.2; 211.0) | 170.1 (143.7; 196.5) | 141.2 (112.7; 169.6) |                 | –36.2                             |
| Acoustic analysis (/a/ vowel, MDVP, CSL) |       |                      |                      |                      |                 |                                   |
| f <sub>o</sub> (Hz)                      | IVT-I | 194.0 (181.2; 206.9) | 191.7 (178.7; 204.7) | 194.3 (181.5; 207.2) | .290            | +1.5                              |
|                                          | IVT-G | 204.3 (191.8; 216.9) | 203.7 (191.2; 216.3) | 211.6 (199.0; 224.1) |                 | +7.6                              |
|                                          | TVT   | 202.9 (190.1; 215.6) | 206.1 (193.7; 218.6) | 202.9 (190.1; 215.6) |                 | –1.6                              |
| Jitter (%)                               | IVT-I | 2.69 (2.15; 3.23)    | 2.67 (2.12; 3.23)    | 1.80 (1.26; 2.34)    | .723            | –0.88                             |
|                                          | IVT-G | 2.10 (1.56; 2.64)    | 2.19 (1.65; 2.72)    | 1.22 (0.68; 1.76)    |                 | –0.93                             |
|                                          | TVT   | 2.97 (2.45; 3.50)    | 2.49 (1.97; 3.01)    | 2.13 (1.55; 2.71)    |                 | –0.60                             |
| Shimmer (%)                              | IVT-I | 6.11 (5.16; 7.07)    | 5.49 (4.50; 6.48)    | 5.13 (4.17; 6.09)    | .722            | –0.67                             |
|                                          | IVT-G | 6.30 (5.34; 7.25)    | 6.13 (5.17; 7.08)    | 4.77 (3.81; 5.72)    |                 | –1.45                             |
|                                          | TVT   | 5.83 (4.90; 6.76)    | 5.92 (4.99; 6.85)    | 4.93 (3.91; 5.94)    |                 | –0.95                             |
| vf <sub>o</sub> (%)                      | IVT-I | 2.68 (2.16; 3.19)    | 2.40 (1.86; 2.93)    | 1.80 (1.29; 2.32)    | .830            | –0.74                             |
|                                          | IVT-G | 1.95 (1.43; 2.47)    | 2.10 (1.59; 2.62)    | 1.22 (0.70; 1.74)    |                 | –0.81                             |
|                                          | TVT   | 2.75 (2.23; 3.27)    | 2.33 (1.83; 2.83)    | 1.86 (1.31; 2.42)    |                 | –0.68                             |
| NHR                                      | IVT-I | 0.15 (0.13; 0.18)    | 0.14 (0.13; 0.16)    | 0.15 (0.14; 0.16)    | .023            | +0.01                             |
|                                          | IVT-G | 0.16 (0.14; 0.18)    | 0.16 (0.14; 0.18)    | 0.12 (0.11; 0.14)    |                 | –0.04 (*)                         |
|                                          | TVT   | 0.15 (0.13; 0.17)    | 0.15 (0.13; 0.16)    | 0.14 (0.13; 0.16)    |                 | –0.01                             |
|                                          |       |                      |                      |                      |                 |                                   |

| Acoustic analysis (/a/ vowel + continuous speech, Praat, AVQI) |       |                         |                         |                         |      |            |
|----------------------------------------------------------------|-------|-------------------------|-------------------------|-------------------------|------|------------|
| CPPs                                                           | IVT-I | 10.52 (9.67; 11.36)     | 11.02 (10.24; 11.79)    | 12.09 (11.32; 12.87)    | .664 | +1.32 (*)  |
|                                                                | IVT-G | 11.46 (10.63; 12.30)    | 11.53 (10.78; 12.28)    | 12.33 (11.56; 13.09)    |      | +0.84      |
|                                                                | TVT   | 10.72 (9.93; 11.51)     | 10.64 (9.89; 11.38)     | 11.40 (10.59; 12.21)    |      | +0.72      |
| HNR (dB)                                                       | IVT-I | 15.36 (14.04; 16.68)    | 15.91 (14.71; 17.11)    | 17.09 (15.89; 18.29)    | .832 | +1.46      |
|                                                                | IVT-G | 16.22 (14.91; 17.54)    | 15.67 (14.51; 16.83)    | 17.04 (15.85; 18.23)    |      | +1.10      |
|                                                                | TVT   | 16.08 (14.85; 17.31)    | 15.67 (14.52; 16.83)    | 17.05 (15.78; 18.32)    |      | +1.18      |
| Shimmer Local (%)                                              | IVT-I | 7.45 (6.27; 8.63)       | 6.23 (5.18; 7.29)       | 5.23 (4.18; 6.29)       | .149 | −1.61      |
|                                                                | IVT-G | 5.57 (4.39; 6.75)       | 6.19 (5.16; 7.21)       | 4.73 (3.67; 5.78)       |      | −1.15      |
|                                                                | TVT   | 6.17 (5.08; 7.26)       | 7.32 (6.30; 8.34)       | 5.90 (4.77; 7.04)       |      | −0.85      |
| Shimmer Local (dB)                                             | IVT-I | 0.69 (0.58; 0.79)       | 0.59 (0.50; 0.69)       | 0.52 (0.43; 0.62)       | .405 | −0.12      |
|                                                                | IVT-G | 0.54 (0.43; 0.64)       | 0.58 (0.49; 0.68)       | 0.46 (0.37; 0.56)       |      | −0.10      |
|                                                                | TVT   | 0.63 (0.54; 0.73)       | 0.70 (0.61; 0.79)       | 0.59 (0.49; 0.69)       |      | −0.08      |
| Slope of LTAS (dB)                                             | IVT-I | −21.99 (−24.38; −19.60) | −20.51 (−22.72; −18.31) | −19.61 (−21.81; −17.41) | .834 | +1.64      |
|                                                                | IVT-G | −20.40 (−22.77; −18.03) | −19.13 (−21.26; −17.00) | −19.17 (−21.35; −17.00) |      | +0.60      |
|                                                                | TVT   | −21.26 (−23.51; −19.02) | −19.79 (−21.92; −17.76) | −20.58 (−22.89; −18.28) |      | +0.06      |
| Tilt of trendline through LTAS (dB)                            | IVT-I | −9.64 (−10.37; −8.91)   | −9.90 (−10.56; −9.23)   | −9.82 (−10.49; −9.15)   | .486 | −0.05      |
|                                                                | IVT-G | −10.04 (−10.76; −9.31)  | −9.75 (−10.40; −9.10)   | −9.74 (−10.41; −9.08)   |      | +0.16      |
|                                                                | TVT   | −9.05 (−9.73; −8.36)    | −9.45 (−10.10; −8.80)   | −9.73 (−10.43; −9.02)   |      | −0.48      |
| Voice Range Profile                                            |       |                         |                         |                         |      |            |
| I-low (dB)                                                     | IVT-I | 60.9 (59.3; 62.6)       | 59.8 (58.1; 61.5)       | 55.7 (54.1; 57.4)       | .336 | −4.7 (*)   |
|                                                                | IVT-G | 59.0 (57.3; 60.6)       | 59.2 (57.6; 60.9)       | 55.1 (53.4; 56.7)       |      | −4.0 (*)   |
|                                                                | TVT   | 58.8 (57.1; 60.4)       | 59.1 (57.4; 60.7)       | 56.3 (54.6; 58.1)       |      | −2.7       |
| I-high (dB)                                                    | IVT-I | 99.2 (96.6; 101.8)      | 98.4 (95.7; 101.0)      | 101.1 (98.5; 103.7)     | .354 | +2.3       |
|                                                                | IVT-G | 97.0 (94.4; 98.6)       | 98.9 (96.4; 101.5)      | 100.5 (98.0; 103.1)     |      | +2.6       |
|                                                                | TVT   | 98.9 (96.4; 101.5)      | 98.7 (96.2; 101.2)      | 101.0 (98.3; 103.7)     |      | +2.2       |
| F-low (Hz)                                                     | IVT-I | 145.9 (133.8; 158.0)    | 146.5 (134.3; 158.8)    | 142.4 (130.3; 154.5)    | .891 | −3.8       |
|                                                                | IVT-G | 155.6 (143.7; 167.5)    | 157.6 (145.7; 169.4)    | 149.9 (138.0; 161.7)    |      | −6.7       |
|                                                                | TVT   | 152.5 (140.8; 164.2)    | 153.5 (141.8; 165.2)    | 152.0 (139.8; 164.1)    |      | −1.0       |
| F-high (Hz)                                                    | IVT-I | 643.5 (551.7; 735.4)    | 592.9 (500.0; 685.8)    | 729.4 (637.6; 821.3)    | .037 | +111.2     |
|                                                                | IVT-G | 613.7 (523.5; 703.8)    | 665.4 (590.3; 755.6)    | 824.0 (734.0; 913.9)    |      | +184.5 (*) |
|                                                                | TVT   | 559.0 (470.1; 648.0)    | 554.5 (465.6; 643.5)    | 741.9 (649.6; 834.2)    |      | +185.2 (*) |

*Note.* \*Significant effect ( $p < .001$ ). IVT-I = individual intense voice therapy; IVT-G = group intense voice therapy; TVT = traditional voice therapy; EM = estimated mean; MPT = maximum phonation time; VC = vital capacity; PQ = phonation quotient; MDVP = Multi-Dimensional Voice Program; CSL = Computerized Speech Lab (Model 4500, Kay PENTAX);  $f_0$  = fundamental frequency;  $vf_0$  = variation in fundamental frequency; NHR = noise-to-harmonics ratio; AVQI = Acoustic Voice Quality Index; CPPs = cepstral peak prominence measures; HNR = harmonics-to-noise ratio; LTAS = long-term average spectrum; I-low = lowest intensity; I-high = highest intensity; F-low = lowest frequency; F-high = highest frequency.
