# Supplementary material
Source: publisher figshare collection journal article supplement (https://asha.figshare.com/articles/dataset/_/7761872)
Supplement: Supplementary file 2 [file 1]

**Supplemental Material S1.** Baseline voice-related symptoms, risk factors, vocal abuse, vocal load and lifestyle habits in the IVT-I, IVT-G, and TVT groups.

|                                    | Group | Occurrence |        |         |       | <i>p</i> value |
|------------------------------------|-------|------------|--------|---------|-------|----------------|
|                                    |       | Daily      | Weekly | Monthly | Never |                |
| Voice-related symptoms             |       |            |        |         |       |                |
| Hoarseness                         | IVT-I | 3          | 5      | 7       | 0     | .360           |
|                                    | IVT-G | 4          | 2      | 8       | 1     |                |
|                                    | TVT   | 6          | 6      | 4       | 0     |                |
| Aphonia                            | IVT-I | 0          | 1      | 4       | 10    | .503           |
|                                    | IVT-G | 0          | 0      | 2       | 13    |                |
|                                    | TVT   | 0          | 0      | 5       | 11    |                |
| Vocal fatigue                      | IVT-I | 5          | 2      | 6       | 2     | .252           |
|                                    | IVT-G | 1          | 1      | 7       | 6     |                |
|                                    | TVT   | 6          | 3      | 4       | 3     |                |
| Shortness of breath while speaking | IVT-I | 1          | 3      | 3       | 8     | .827           |
|                                    | IVT-G | 1          | 1      | 3       | 10    |                |
|                                    | TVT   | 3          | 2      | 4       | 7     |                |
| Changes in habitual pitch          | IVT-I | 4          | 2      | 4       | 5     | .222           |
|                                    | IVT-G | 0          | 2      | 3       | 10    |                |
|                                    | TVT   | 5          | 1      | 4       | 6     |                |
| Reduced pitch range                | IVT-I | 3          | 3      | 4       | 5     | .248           |
|                                    | IVT-G | 2          | 3      | 4       | 6     |                |
|                                    | TVT   | 9          | 1      | 3       | 3     |                |
| Globus sensation                   | IVT-I | 2          | 5      | 2       | 6     | .204           |
|                                    | IVT-G | 1          | 0      | 4       | 10    |                |
|                                    | TVT   | 2          | 3      | 5       | 6     |                |
| Sore throat                        | IVT-I | 1          | 4      | 8       | 2     | .821           |
|                                    | IVT-G | 0          | 2      | 9       | 4     |                |
|                                    | TVT   | 1          | 5      | 7       | 3     |                |
| Dry throat                         | IVT-I | 1          | 8      | 4       | 2     | .426           |
|                                    | IVT-G | 5          | 4      | 3       | 3     |                |
|                                    | TVT   | 4          | 5      | 6       | 1     |                |
| Tight throat                       | IVT-I | 3          | 3      | 4       | 5     | .636           |
|                                    | IVT-G | 1          | 1      | 4       | 9     |                |
|                                    | TVT   | 3          | 4      | 3       | 6     |                |
| Tickling throat                    | IVT-I | 2          | 2      | 5       | 6     | .406           |
|                                    | IVT-G | 1          | 2      | 7       | 5     |                |
|                                    | TVT   | 2          | 7      | 4       | 3     |                |

|                                                       |       |   |   |    |    |        |
|-------------------------------------------------------|-------|---|---|----|----|--------|
| Burning throat                                        | IVT-I | 1 | 2 | 5  | 7  | .441   |
|                                                       | IVT-G | 3 | 3 | 2  | 7  |        |
|                                                       | TVT   | 0 | 5 | 5  | 6  |        |
| Risk factors                                          |       |   |   |    |    |        |
| Reflux                                                | IVT-I | 1 | 1 | 6  | 7  | .983   |
|                                                       | IVT-G | 1 | 1 | 4  | 9  |        |
|                                                       | TVT   | 1 | 1 | 4  | 10 |        |
| Allergies                                             | IVT-I | 2 | 0 | 3  | 10 | .725   |
|                                                       | IVT-G | 1 | 0 | 5  | 9  |        |
|                                                       | TVT   | 2 | 0 | 2  | 12 |        |
| Upper respiratory tract infections                    | IVT-I | 1 | 1 | 7  | 6  | .853   |
|                                                       | IVT-G | 0 | 1 | 6  | 8  |        |
|                                                       | TVT   | 1 | 0 | 9  | 6  |        |
| Contact with irritating substances (paint, glue etc.) | IVT-I | 0 | 2 | 4  | 9  | .687   |
|                                                       | IVT-G | 0 | 0 | 3  | 12 |        |
|                                                       | TVT   | 0 | 1 | 3  | 12 |        |
| Stress                                                | IVT-I | 2 | 3 | 9  | 1  | .873   |
|                                                       | IVT-G | 3 | 5 | 5  | 2  |        |
|                                                       | TVT   | 4 | 4 | 7  | 1  |        |
| Vocal abuse                                           |       |   |   |    |    |        |
| Coughing                                              | IVT-I | 4 | 1 | 6  | 4  | .753   |
|                                                       | IVT-G | 2 | 4 | 5  | 4  |        |
|                                                       | TVT   | 2 | 3 | 8  | 3  |        |
| Throat clearing                                       | IVT-I | 4 | 2 | 6  | 3  | .250   |
|                                                       | IVT-G | 5 | 2 | 1  | 7  |        |
|                                                       | TVT   | 3 | 4 | 6  | 3  |        |
| Whispering                                            | IVT-I | 1 | 4 | 9  | 1  | .351   |
|                                                       | IVT-G | 3 | 4 | 4  | 4  |        |
|                                                       | TVT   | 3 | 7 | 4  | 2  |        |
| Screaming or yelling                                  | IVT-I | 3 | 2 | 7  | 3  | .139   |
|                                                       | IVT-G | 0 | 4 | 10 | 1  |        |
|                                                       | TVT   | 0 | 5 | 6  | 5  |        |
| Imitating voices or sounds                            | IVT-I | 1 | 2 | 3  | 9  | > .999 |
|                                                       | IVT-G | 1 | 3 | 2  | 9  |        |
|                                                       | TVT   | 0 | 3 | 3  | 10 |        |
| Hard glottal onset                                    | IVT-I | 4 | 4 | 1  | 6  | .158   |
|                                                       | IVT-G | 3 | 0 | 6  | 6  |        |
|                                                       | TVT   | 3 | 4 | 5  | 4  |        |

|                                                       |       |   |   |    |    |      |
|-------------------------------------------------------|-------|---|---|----|----|------|
| Singing or acting without technique                   | IVT-I | 1 | 2 | 2  | 10 | .890 |
|                                                       | IVT-G | 2 | 2 | 3  | 8  |      |
|                                                       | TVT   | 0 | 3 | 4  | 9  |      |
| Vocal load                                            |       |   |   |    |    |      |
| Speaking at inappropriate loudness                    | IVT-I | 4 | 3 | 3  | 5  | .898 |
|                                                       | IVT-G | 2 | 4 | 5  | 4  |      |
|                                                       | TVT   | 3 | 6 | 3  | 4  |      |
| Speaking at heightened pitch                          | IVT-I | 2 | 2 | 3  | 8  | .737 |
|                                                       | IVT-G | 0 | 1 | 2  | 12 |      |
|                                                       | TVT   | 1 | 3 | 2  | 10 |      |
| Strained phonation                                    | IVT-I | 3 | 4 | 4  | 4  | .219 |
|                                                       | IVT-G | 1 | 2 | 3  | 9  |      |
|                                                       | TVT   | 6 | 4 | 1  | 5  |      |
| Speaking for a large audience                         | IVT-I | 2 | 3 | 2  | 8  | .553 |
|                                                       | IVT-G | 0 | 2 | 1  | 12 |      |
|                                                       | TVT   | 3 | 2 | 3  | 8  |      |
| Speaking in large spaces                              | IVT-I | 2 | 2 | 1  | 10 | .424 |
|                                                       | IVT-G | 0 | 2 | 5  | 8  |      |
|                                                       | TVT   | 3 | 1 | 3  | 9  |      |
| Speaking in air-conditioned rooms                     | IVT-I | 3 | 0 | 3  | 9  | .570 |
|                                                       | IVT-G | 0 | 1 | 4  | 10 |      |
|                                                       | TVT   | 2 | 2 | 4  | 8  |      |
| Speaking in rooms with insufficient humidity          | IVT-I | 3 | 1 | 3  | 8  | .891 |
|                                                       | IVT-G | 2 | 1 | 2  | 10 |      |
|                                                       | TVT   | 4 | 0 | 4  | 8  |      |
| Speaking for a long period of time without vocal rest | IVT-I | 4 | 1 | 1  | 9  | .408 |
|                                                       | IVT-G | 1 | 3 | 4  | 7  |      |
|                                                       | TVT   | 4 | 4 | 2  | 6  |      |
| Hobbies with high vocal load                          | IVT-I | 1 | 4 | 0  | 10 | .198 |
|                                                       | IVT-G | 0 | 7 | 2  | 6  |      |
|                                                       | TVT   | 0 | 4 | 4  | 8  |      |
| Professional voice use                                | IVT-I | 3 | 0 | 0  | 12 | .163 |
|                                                       | IVT-G | 0 | 0 | 0  | 15 |      |
|                                                       | TVT   | 4 | 0 | 0  | 12 |      |
| Lifestyle habits                                      |       |   |   |    |    |      |
| Eating late and heavy food                            | IVT-I | 5 | 1 | 5  | 4  | .335 |
|                                                       | IVT-G | 1 | 2 | 6  | 6  |      |
|                                                       | TVT   | 1 | 1 | 10 | 4  |      |
| Alcohol use                                           | IVT-I | 1 | 7 | 5  | 2  |      |

|                                |       |   |   |    |    |                              |
|--------------------------------|-------|---|---|----|----|------------------------------|
|                                | IVT-G | 1 | 5 | 6  | 3  | .850                         |
|                                | TVT   | 0 | 8 | 7  | 1  |                              |
| Smoking                        | IVT-I | 0 | 0 | 0  | 10 | not computable<br>(constant) |
|                                | IVT-G | 0 | 0 | 0  | 10 |                              |
|                                | TVT   | 0 | 0 | 0  | 10 |                              |
| Coffee or tea                  | IVT-I | 9 | 2 | 0  | 4  | .277                         |
|                                | IVT-G | 4 | 4 | 2  | 5  |                              |
|                                | TVT   | 7 | 6 | 0  | 3  |                              |
| Soft drinks, carbonated drinks | IVT-I | 4 | 5 | 3  | 3  | .603                         |
|                                | IVT-G | 3 | 6 | 1  | 5  |                              |
|                                | TVT   | 5 | 8 | 2  | 1  |                              |
| Going out                      | IVT-I | 0 | 7 | 7  | 1  | .916                         |
|                                | IVT-G | 0 | 9 | 5  | 1  |                              |
|                                | TVT   | 0 | 7 | 8  | 1  |                              |
| Sleep deprivation              | IVT-I | 1 | 8 | 6  | 0  | .766                         |
|                                | IVT-G | 1 | 6 | 7  | 1  |                              |
|                                | TVT   | 1 | 4 | 10 | 1  |                              |

*Note.* IVT-I = individual intense voice therapy; IVT-G = group intense voice therapy; TVT = traditional voice therapy.
